# Supplementary material for: Long noncoding RNA ZFAS1 promoting small nucleolar RNA-mediated 2′-O-methylation via NOP58 recruitment in colorectal cancer
Source: PubMed Central journal article supplement (PMC7243338; doi:10.1186/s12943-020-01201-w), 2020-05-22
Supplement: 12943_2020_1201_MOESM1_ESM.pdf [file 12943_2020_1201_MOESM1_ESM.pdf]

## Additional file 1

### Long noncoding RNA ZFAS1 promoting small nucleolar RNA-mediated 2'-O-methylation via NOP58 recruitment in colorectal cancer

#### This file includes:

- **Table S1.** *Short hairpin RNAs (shRNAs)* sequence against ZFAS1
- **Table S2.** *Short hairpin RNAs (shRNAs)* sequence against NOP58
- **Table S3.** **The reaction assay of qRT-PCR method**
- **Table S4.** Primers used in qRT-PCR assay
- **Table S5.** Probes used in situ hybridization (ISH) assay
- **Table S6.** RNA probes used for RNA pull-down assay
- **Table S7.** Primers used in site-specific 2'-O-methylation for RTL-P assay
- **Table S8.** RTL-P assay for rRNA 2'-O -methylation
- **Table S9.** Probes used in site-specific 2'-O-methylation for double-stranded primer based on single-stranded toehold (DPBST) assay
- **Table S10.** Double-stranded primer based on single-stranded toehold (DPBST) assay
- **Table S11.** Data of LncRNAs cluster in the Heat map analysis
- **Table S12.** Data of snoRNAs cluster in the Heat map analysis
- **Table S13.** Data of mRNAs cluster in the Heat map analysis
- **Table S14.** **The enriched target genes intersected by ZFAS1, SNORD12C/78 in GO analysis**
- **Table S15.** Prognostic information of included colorectal cancer patients ( $n=157$ )
- **Table S16.** Multivariate COX regression analysis of the association of ZFAS1 and NOP58 expression with DFS and OS in CRC patients

**Table S1. Short hairpin RNAs (*shRNAs*) sequence against ZFAS1**

| <b>shRNA</b>            | <b>Sequence (5'-3')</b> |
|-------------------------|-------------------------|
| ZFAS1-Homo-455          | GCCATTCGTTCTTTCGCGTCT   |
| ZFAS1-Homo-525          | GCTATTGTCCTGCCCGTTAGA   |
| ZFAS1-Homo-769(shRNA#1) | GATTCAGTCTGCCTTGTAACA   |
| ZFAS1-Homo-884(shRNA#2) | CAAGGTTACTGTATACATAGC   |

**Table S2. Short hairpin RNAs (*shRNAs*) sequence against NOP58**

| <b>shRNA</b>             | <b>Sequence (5'-3')</b> |
|--------------------------|-------------------------|
| NOP58-Homo-386           | GCAGAAGCATTAGCAGCATTC   |
| NOP58-Homo-660           | GCCTGTCTCGATATAGATTGA   |
| NOP58-Homo-932(shRNA#1)  | GCAGCTGCAGAGATATCAATG   |
| NOP58-Homo-1520(shRNA#2) | GGTGACTCCACACTTCCAACC   |

**Table S3. The reaction assay of qRT-PCR method**

| mRNA and LncRNA                                                                                |                        |
|------------------------------------------------------------------------------------------------|------------------------|
| <b>Relative reagents</b>                                                                       | <b>1×system (10μL)</b> |
| 5×RT Buffer                                                                                    | 2 μL                   |
| Enzyme Mix                                                                                     | 0.5 μL                 |
| Primer Mix                                                                                     | 0.5 μL                 |
| RNA+DEPC H <sub>2</sub> O                                                                      | 7 μL (400ng)           |
| <b>Program: 37 °C/ 15min→ 98 °C/ 5min→ Maintain at 4 °C</b>                                    |                        |
| snoRNA                                                                                         |                        |
| <b>Relative reagents</b>                                                                       | <b>1×system(10μL)</b>  |
| 5×Buffer                                                                                       | 2 μL                   |
| M-MLV                                                                                          | 0.3 μL                 |
| RII                                                                                            | 0.25 μL                |
| dNTP(10mM each)                                                                                | 1 μL                   |
| Proprietary RT primer                                                                          | 1 μL                   |
| snoRNA+DEPC H <sub>2</sub> O                                                                   | 5.45 μL (1000ng)       |
| <b>Program: 42 °C/ 60min→ 70 °C/ 10min→ Maintain at 4 °C</b>                                   |                        |
| qPCR                                                                                           |                        |
| <b>Relative reagents</b>                                                                       | <b>1×system(10μL)</b>  |
| SYBR                                                                                           | 5 μL                   |
| ROX                                                                                            | 0.2 μL                 |
| Forward Primer(10μM)                                                                           | 0.4 μL                 |
| Reverse Primer(10μM)                                                                           | 0.4 μL                 |
| cDNA                                                                                           | 4 μL                   |
| <b>Program: 95 °C/ 60sec→[95 °C/15sec→ 60 °C/15sec→72 °C/45sec]×40cycles→ Maintain at 4 °C</b> |                        |

**Table S4. Primers used in qRT-PCR assay**

| <b>Primer</b>         | <b>Sequence (5'-3')</b>   |
|-----------------------|---------------------------|
| ZFAS1-Forward         | GCTATTGTCCTGCCCGTTAG      |
| ZFAS1-Reverse         | TCGTCAGGAGATCGAAGGTT      |
| NOP58-Forward         | GGCAGCGTGTTCTGATTCTT      |
| NOP58-Reverse         | GCCTGCCAGAAGCTGTAGAGT     |
| FBL-Forward           | GTGGAGGAGGAGGAAGAGGT      |
| FBL-Reverse           | GGCTCCACCATCACATTCTT      |
| NOP56-Forward         | CTGGAGGAGCTGACAATGGA      |
| NOP56-Reverse         | CACCACACGACTGGAGAAGC      |
| <b>SNU13</b> -Forward | CCTCTGCCATCCTTCATCCT      |
| <b>SNU13</b> -Reverse | TCTCTGTCCTGGCTCCATCA      |
| LAMC2-Forward         | CTGGGTTGTGCACATTTCTTT     |
| LAMC2-Reverse         | AAATACAGAAGCAAGGCAGCA     |
| EIF4A3-Forward        | GCTGCTTGCTCTCGGTGACTAC    |
| EIF4A3-Reverse        | GCTTCCTGATGTCCTCGCCAAC    |
| MACC1-Forward         | TTCTTTTGATTCCCTCCGGTGA    |
| MACC1-Reverse         | ACTCTGATGGGCATGTGCTG      |
| CSE1L-Forward         | TTAATAGTTCAGTGTATGGCGTTGG |
| CSE1L-Reverse         | AGTCTCCACAGTGTCCGTCAA     |
| GAPDH-Forward         | TTGCCCTCAACGACCCTTT       |
| GAPDH-Reverse         | TCCTCTTGTGCTCTTGCTGG      |

**Table S5. Probes used in situ hybridization (ISH) assay**

| <b>Digoxin-labeled probe</b> | <b>Sequence (5'-3')</b>                         |
|------------------------------|-------------------------------------------------|
| ZFAS1-(1)                    | GGAAC CCGTC GAGCG GTTTG GTGCG TGTGA AGCGC GACAT |
| ZFAS1-(2)                    | GGTTA TATAA GGGAG GTTCA GGAAG CCATT CGTTC TTTCG |
| ZFAS1-(3)                    | CTACA ACCTT CGATC TCCTG ACGAG TTTAT TGTTG GCCAA |

**Table S6. RNA probes used for RNA pull-down assay**

| <b>Probe</b>    | <b>Sequence (5'-3')</b>                | <b>Modified method</b> |
|-----------------|----------------------------------------|------------------------|
| ZFAS1-WT        | GATTTTGG <u>AAGA</u> GGGAGTCACCACTGGAC | 5' Biotin              |
| ZFAS1-mut       | GATTTTGG <u>TTCT</u> GGGAGTCACCACTGGAC | 5' Biotin              |
| ZFAS1-antisense | CTAAAACCTTCTCCCTCAGTGGTGACCTG          | 5' Biotin              |

**Table S7. Primers used in site-specific 2'-O-methylation for RTL-P assay**

| <b>Primer</b> | <b>Sequence (5'-3')</b> |
|---------------|-------------------------|
| SNORD12C-Fu   | CCUACUAUCCAGCGAAACCAC   |
| SNORD12C-Fd   | AAAGAAGACCCTGTTGAGCTT   |
| SNORD12C-R    | TATTCTACACCTCTCATGTCT   |
| SNORD12C-RT   | TATTCTACACCTCTCATGTCTCT |
| SNORD78-Fu    | TAATCCTGCTCAGTACGAGA    |
| SNORD78-Fd    | CTGTATGTGCTTGGCTGAG     |
| SNORD78-R     | ATTCTGACTTAGAGGCGTTCA   |
| SNORD78-RT    | CGCTGCCGTATCGTTCGCCTG   |



**Table S8. RTL-P assay for rRNA 2'-O-methylation**

| <b>Low dNTP reverse transcription reaction</b>                             |                        |
|----------------------------------------------------------------------------|------------------------|
| <b>Relative reagents</b>                                                   | <b>1×system (10μL)</b> |
| Total RNA                                                                  | 1 μL(100ng)            |
| Specific RT primer(50μM)                                                   | 1 μL                   |
| RNase free H <sub>2</sub> O                                                | up to 6 μL             |
| <b>Program: 70 °C/10min→ Ice 2min</b>                                      |                        |
| <b>Add the following reverse transcription reaction solution</b>           |                        |
| 5×M-MLV Buffer                                                             | 2 μL                   |
| RTase M-MLV(RNase H-)(200U/μL)                                             | 0.5 μL                 |
| RNase Inhibitor(40U/μL)                                                    | 0.25 μL                |
| dNTP (low 10μM; high 1mM)                                                  | 0.5 μL                 |
| RNase free H <sub>2</sub> O                                                | up to 10 μL            |
| <b>Program: 42 °C/60min → 70 °C/15min → Maintain at 4 °C</b>               |                        |
| <b>PCR</b>                                                                 |                        |
| <b>Relative reagents</b>                                                   | <b>1×system(10μL)</b>  |
| 10×Ex taq Buffer                                                           | 2.5μL                  |
| Ex taq DNA polymerase(5U/μL)                                               | 0.25 μL                |
| dNTP(10mM)                                                                 | 0.5 μL                 |
| Forward Primer(50μM)                                                       | 0.5 μL                 |
| Reverse Primer(50μM)                                                       | 0.5 μL                 |
| cDNA                                                                       | 2 μL                   |
| RNase free H <sub>2</sub> O                                                | up to 25 μL            |
| <b>Program: 94 °C/4min→[94 °C/30sec→ 55 °C/30sec→72 °C/1min]×21cycles→</b> |                        |
| <b>Maintain at 4 °C</b>                                                    |                        |

**Table S9. Probes used in site-specific 2'-O-methylation for Double-stranded primers  
based on single-stranded toehold (DPBST) assay**

| <b>BST dsPrimers</b> | <b>Sequence (5'-3')</b>                                                         |
|----------------------|---------------------------------------------------------------------------------|
| SNORD12-sense        | GCCTCCCACTTATTCTACACCTTCATGTCTCTTCACCGTGCCAG<br>ACTAGAGTCAAGCTCAACAGGGTCTTCTTTC |
| SNORD12-antisense    | GAAAGAAGACCCTGTTGAGCTTGACTCTAGTCTGGCACGGTGAA<br>GAGACAACCTC-C6 spacer           |
| SNORD12C-Forward     | CCTACTATCCAGCGAAACCAC                                                           |
| SNORD12C-Reverse     | GCCTCCCACTTATTCTACACC                                                           |
| SNORD78-sense        | GAGGCGTTCAGTCATAATCCCACAGATGGTAGCTTCGCCCCATT<br>GGCTCCTCAGCCAAGCACATACACCAAA    |
| SNORD78-antisense    | ACATTTGGTGTATGTGCTTGGCTGAGGAGCCAATGGGGCGAAGC<br>TACCATGACA-C6 spacer            |
| SNORD78-Forward      | GATGTCGGCTCTTCCTATCAT                                                           |
| SNORD78-Reverse      | TCTCGTACTGAGCAGGATTAC                                                           |

**Table S10. Double-stranded primer based on single-stranded toehold (DPBST) assay**

| <b>Probes pretreatment</b>                                                        |                        |
|-----------------------------------------------------------------------------------|------------------------|
| Probe A and B mix in equal volume                                                 |                        |
| <b>Program: 90 °C/1min → Room temperature 5min</b>                                |                        |
| <b>Reverse transcription reaction</b>                                             |                        |
| <b>Relative reagents</b>                                                          | <b>1×system (10μL)</b> |
| Total RNA                                                                         | 1 μL(100ng)            |
| Specific RT primer(A and B each 10μM)                                             | 2 μL                   |
| RNase free H <sub>2</sub> O                                                       | up to 6 μL             |
| <b>Program: 70 °C/10min → Ice 2min</b>                                            |                        |
| <b>Add the following reverse transcription reaction solution</b>                  |                        |
| 5×M-MLV Buffer                                                                    | 2 μL                   |
| RTase M-MLV(RNase H-)(200U/μL)                                                    | 0.5 μL                 |
| RNase Inhibitor(40U/μL)                                                           | 0.25 μL                |
| dNTP(10mM)                                                                        | 0.5 μL                 |
| RNase free H <sub>2</sub> O                                                       | up to 10 μL            |
| <b>Program: 42 °C/60min → 70 °C/15min → Maintain at 4 °C</b>                      |                        |
| <b>qPCR</b>                                                                       |                        |
| <b>Relative reagents</b>                                                          | <b>1×system(10μL)</b>  |
| TB Green premix Ex TaqII                                                          | 10μL                   |
| Forward Primer(50μM)                                                              | 0.8 μL                 |
| Reverse Primer(50μM)                                                              | 0.8 μL                 |
| ROX(50×)                                                                          | 0.4 μL                 |
| cDNA dNTP(10mM)                                                                   | 2 μL                   |
| RNase free H <sub>2</sub> O                                                       | up to 20 μL            |
| <b>Program: 95 °C/30sec→[95 °C/5sec→ 60 °C/34sec → 95 °C/ 1min] × 40 cycles →</b> |                        |
| <b>Maintain at 4 °C</b>                                                           |                        |

**Table S11. Data of LncRNAs cluster in the Heat map analysis**

| <b>Up-regulated</b> |                    | <b>Down-regulated</b> |                    |
|---------------------|--------------------|-----------------------|--------------------|
| <b>LncRNA</b>       | <b>Fold Change</b> | <b>LncRNA</b>         | <b>Fold Change</b> |
| ZFAS1               | 6.65               | RNF138P1              | 2.21               |
| TERC                | 3.17               | PSMD6-AS2             | 2.64               |
| TECRP1              | 2.05               | PGM5P2                | 2.64               |
| SNHG8               | 3.45               | NPY6R                 | 4.92               |
| SNHG17              | 2.11               | NCF1C                 | 2.02               |
| SCARNA9L            | 3.11               | NCF1B                 | 2.27               |
| SCARNA23            | 3.12               | MIR650                | 4.14               |
| RPS2P7              | 2.75               | MIR628                | 2.10               |
| RPL13AP20           | 2.06               | MIR490                | 2.04               |
| RPL12P2             | 2.05               | MIR4521               | 2.25               |
| RNU5F-1             | 2.13               | MIR4451               | 2.02               |
| RANP1               | 2.93               | MIR107                | 2.04               |
| PSAT1P4             | 2.43               | LOC285972             | 2.37               |
| PROX1-AS1           | 2.29               | LOC285878             | 4.13               |
| MIR622              | 2.98               | LINC00675             | 2.64               |
| MIR614              | 2.42               | LINC00641             | 3.06               |
| MIR3189             | 4.02               | LINC00294             | 2.24               |
| MIR1206             | 4.34               | IGKV2-29              | 8.77               |
| MIR1204             | 3.72               | GVINP1                | 3.54               |
| MGC32805            | 2.78               | FENDRR                | 4.01               |
| LOC541471           | 2.56               | CMAHP                 | 6.25               |
| LINC00493           | 2.10               | ANKRD36BP2            | 3.31               |
| LINC00273           | 2.46               | ADAMTS9-AS2           | 3.18               |
| HSP90AB3P           | 2.18               | ABCC13                | 2.12               |
| HSD17B7P2           | 2.14               |                       |                    |
| FEZF1-AS1           | 3.69               |                       |                    |
| FAM83H-AS1          | 2.16               |                       |                    |
| CRNDE               | 3.88               |                       |                    |
| CCAT1               | 54.88              |                       |                    |
| BACE2-IT1           | 3.05               |                       |                    |

**Table S12. Data of snoRNAs cluster in the Heat map analysis**

| <b>Up-regulated</b> |                    | <b>Down-regulated</b> |                    |
|---------------------|--------------------|-----------------------|--------------------|
| <b>snoRNA</b>       | <b>Fold Change</b> | <b>snoRNA</b>         | <b>Fold Change</b> |
| SNORD12             | 9.02               | SNORD115-6            | 3.20               |
| SNORD12B            | 7.42               | SNORD115-5            | 3.08               |
| <b>SNORD12C</b>     | 5.71               | SNORD115-44           | 2.42               |
| SNORD72             | 3.99               | SNORD115-43           | 3.38               |
| SNORD70             | 3.21               | SNORD115-42           | 3.10               |
| SNORD56             | 2.25               | SNORD115-40           | 2.59               |
| SNORD47             | 3.74               | SNORD115-4            | 2.31               |
| SNORD27             | 2.96               | SNORD115-39           | 2.18               |
| SNORD24             | 2.14               | SNORD115-34           | 5.80               |
| SNORD1C             | 4.85               | SNORD115-24           | 2.10               |
| SNORD1B             | 2.65               | SNORD115-21           | 2.96               |
| SNORD19             | 2.11               | SNORD115-16           | 2.65               |
| SNORD15A            | 3.10               | SNORD115-15           | 2.50               |
| SNORD14E            | 2.33               | SNORD115-12           | 3.08               |
| SNORD14D            | 2.21               | SNORD115-11           | 3.38               |
| SNORD14B            | 2.89               | SNORD115-1            | 2.47               |
| SNORD87             | 3.02               |                       |                    |
| <b>SNORD78</b>      | 6.86               |                       |                    |
| SNORD75             | 3.06               |                       |                    |
| SNORD123            | 2.39               |                       |                    |
| SNORD11B            | 2.15               |                       |                    |
| SNORA74A            | 2.30               |                       |                    |
| SNORA71D            | 5.83               |                       |                    |
| SNORA71C            | 12.02              |                       |                    |
| SNORA71B            | 3.27               |                       |                    |
| SNORA71A            | 17.16              |                       |                    |
| SNORA70G            | 2.03               |                       |                    |
| SNORA70D            | 2.02               |                       |                    |
| SNORA70C            | 2.22               |                       |                    |
| SNORA70             | 2.28               |                       |                    |
| SNORA68             | 2.81               |                       |                    |
| SNORA65             | 4.82               |                       |                    |
| SNORA5A             | 2.70               |                       |                    |
| SNORA59B            | 2.68               |                       |                    |
| SNORA41             | 2.26               |                       |                    |
| SNORA32             | 2.61               |                       |                    |
| SNORA31             | 3.90               |                       |                    |
| SNORA24             | 2.58               |                       |                    |
| SNORA23             | 2.44               |                       |                    |

**Table S13. Data of mRNAs cluster in the Heat map analysis**

| <b>Up-regulated</b> |                    | <b>Down-regulated</b> |                    |
|---------------------|--------------------|-----------------------|--------------------|
| <b>mRNA</b>         | <b>Fold Change</b> | <b>mRNA</b>           | <b>Fold Change</b> |
| <b>NOP58</b>        | 4.22               | LARGE                 | 1.54               |
| PAK1IP1             | 2.47               | EIF4E3                | 2.17               |
| RPL30               | 2.08               | VSIG2                 | 3.19               |
| DDX21               | 7.19               | TMEM63B               | 2.01               |
| ERP27               | 3.98               | TCF7L2                | 2.26               |
| MACC1               | 8.89               | NAA60                 | 1.51               |
| ESM1                | 4.14               | ATP5A1                | 2.04               |
| MYC                 | 6.71               | ZYG11B                | 1.71               |
| CEBPZ               | 1.70               | HSBP1L1               | 2.50               |
| RPS14               | 2.13               | TLCD2                 | 1.63               |
| ZNF280C             | 2.44               |                       |                    |
| MMP10               | 2.42               |                       |                    |
| SNRPB2              | 2.48               |                       |                    |
| FANCB               | 2.71               |                       |                    |
| TTC26               | 2.59               |                       |                    |
| RAP2A               | 2.13               |                       |                    |
| DIMT1               | 2.24               |                       |                    |
| PSMG1               | 1.85               |                       |                    |
| RRS1                | 3.37               |                       |                    |
| FKBP10              | 2.13               |                       |                    |
| TUBG1               | 1.87               |                       |                    |
| LAMC2               | 6.15               |                       |                    |
| WDR12               | 2.28               |                       |                    |
| TRIM27              | 1.65               |                       |                    |
| TOMM22              | 1.70               |                       |                    |
| MTDH                | 1.60               |                       |                    |
| GRIN2B              | 10.82              |                       |                    |
| NUP155              | 3.42               |                       |                    |
| RPS2                | 2.39               |                       |                    |
| GINS1               | 2.84               |                       |                    |
| AGO2                | 2.06               |                       |                    |
| XPO7                | 1.65               |                       |                    |
| LRP8                | 2.60               |                       |                    |
| RNF43               | 12.08              |                       |                    |
| WDYHV1              | 1.56               |                       |                    |
| GRPEL1              | 1.91               |                       |                    |
| KCNH8               | 3.96               |                       |                    |
| SNRPF               | 1.61               |                       |                    |
| WDR74               | 1.92               |                       |                    |
| PLEK2               | 3.03               |                       |                    |

---

|        |       |
|--------|-------|
| ERO1L  | 4.91  |
| RPL39  | 3.22  |
| MAPRE1 | 2.00  |
| ADNP   | 1.75  |
| IER3   | 10.30 |
| SKP2   | 2.75  |
| NAT10  | 2.48  |
| ACOT9  | 1.80  |
| RPS27A | 1.69  |
| NHP2L1 | 1.47  |

---

**Table S14. The enriched target genes intersected by ZFAS1, SNORD12C/78 in GO analysis**

| Intersected target genes |          |         |           |
|--------------------------|----------|---------|-----------|
| PRPF40A                  | LRP8     | CIRH1A  | RPS25     |
| NUP35                    | CAD      | PPAT    | C10orf113 |
| POLR2G                   | SKP2     | POLA1   | CEBPZ     |
| GNL3                     | PSMG1    | ENO1    | GRHL3     |
| SLCO4A1                  | WDR43    | RAP2A   | ANAPC1    |
| MYO1B                    | ASUN     | C11orf1 | RPL39     |
| G3BP1                    | FOPNL    | RPS2    | RBM3      |
| NUP155                   | RPL28    | SNAI1   | ACOT9     |
| LMO7                     | QTRT1    | BRWD3   | IL1RAP    |
| TOP1MT                   | MPP6     | SOX9    | CSE1L     |
| POLR1C                   | EIF2S3L  | SHROOM4 | RNF43     |
| TRIO                     | PPP2R2A  | EIF2S3  | WDYHV1    |
| CSTF1                    | EIF3M    | RPL35A  | E2F5      |
| RBM12                    | GNB2L1   | MORF4L2 | LARS2     |
| PNPT1                    | RPS27A   | MOCS3   | CBWD5     |
| IFITM3                   | RPS3     | RBMX    | HKDC1     |
| RPL36A                   | RAD18    | PRPF6   | PSME3     |
| CMSS1                    | WDR75    | ANO9    | XPOT      |
| PTCD3                    | EIF2A    | PAICS   | UTP14A    |
| NAT10                    | TTI1     | FKBP10  | DKC1      |
| DARS                     | MAPRE1   | NIT2    | PAK1IP1   |
| PLEK2                    | TUBG1    | RPS7    | NMD3      |
| URB1                     | CBWD3    | LAMC2   | GART      |
| PSMA3                    | ERO1L    | NONO    | RSL1D1    |
| GINS1                    | XPNPEP3  | RPL37A  | PPA1      |
| TMEM182                  | MTDH     | SIM2    | MYC       |
| RPL29                    | HSP90AB1 | IGBP1   | SNX20     |
| GRPEL1                   | ABHD12   | GRIN2B  | TOMM22    |
| RPS20                    | SNRPF    | ZCCHC7  | SULT2B1   |
| KCNH8                    | RPL18    | PABPC1  | RPS14     |
| IMPDH2                   | TRBV6-8  | WDR36   | RPL30     |
| RPS10                    | HPS4     | POFUT1  | TTC27     |
| DDX31                    | NEBL     | XPO4    | DIMT1     |
| RPP40                    | MACC1    | RUVBL1  | NUDCD1    |
| POLR1B                   | BHLHE40  | RPL11   | RCC1      |
| PHKA2                    | MAK16    | INTS10  | G6PC3     |
| KIAA0020                 | PUS1     | RPL8    | GEMIN5    |
| GTPBP4                   | RPS13    | LRP4    | CCT6A     |
| GTF3C3                   | WDR12    | TRIM27  | SFXN3     |
| AP3M2                    | MRE11A   | GABRE   | XPO7      |
| ZNF280C                  | GSTP1    | GRPEL2  | IKBKAP    |



|          |        |          |          |
|----------|--------|----------|----------|
| CBWD6    | DDX21  | C11orf49 | FANCB    |
| WDR74    | NOP58  | MKI67IP  | TARBP1   |
| SLC25A32 | WRN    | EPHX4    | RBL1     |
| ARMC1    | SF3A3  | QRSL1    | AMER1    |
| ADAT2    | RIPK2  | RRS1     | RPF2     |
| SLC15A4  | DDX10  | ADNP     | MTERFD1  |
| YEATS2   | ALYREF | STC2     | TTC26    |
| ERP27    | MFSD12 | SNRPB2   | HSP90AA1 |
| PUS7     | PPRC1  | RPL31    | CCT7     |
| SH2D4A   | MTFR1  |          |          |

---

**Table S15. Prognostic information of included colorectal cancer patients (n=157)**

| patient | ZFAS1<br>(high or low) | NOP58<br>(high or low) | EIF4A3<br>(high or low) | LAMC2<br>(high or low) | DFS<br>state | DFS<br>(months) | OS<br>state | OS<br>(months) |
|---------|------------------------|------------------------|-------------------------|------------------------|--------------|-----------------|-------------|----------------|
| 1       | 0                      | 0                      | 0                       | 1                      | dead         | 25              | dead        | 25             |
| 2       | 1                      | 0                      | 1                       | 0                      | dead         | 20              | dead        | 20             |
| 3       | 0                      | 1                      | 0                       | 1                      | alive        | 55              | alive       | 55             |
| 4       | 1                      | 0                      | 1                       | 0                      | alive        | 98              | alive       | 98             |
| 5       | 1                      | 1                      | 1                       | 1                      | alive        | 55              | alive       | 55             |
| 6       | 1                      | 0                      | 1                       | 1                      | dead         | 11              | dead        | 11             |
| 7       | 1                      | 1                      | 0                       | 0                      | alive        | 98              | alive       | 98             |
| 8       | 1                      | 1                      | 0                       | 1                      | dead         | 25              | dead        | 25             |
| 9       | 0                      | 0                      | 1                       | 1                      | alive        | 110             | alive       | 110            |
| 10      | 1                      | 0                      | 1                       | 1                      | alive        | 53              | alive       | 53             |
| 11      | 1                      | 1                      | 1                       | 1                      | dead         | 36              | dead        | 36             |
| 12      | 0                      | 0                      | 1                       | 0                      | alive        | 72              | alive       | 72             |
| 13      | 0                      | 1                      | 0                       | 0                      | dead         | 30              | dead        | 30             |
| 14      | 1                      | 1                      | 1                       | 0                      | alive        | 74              | alive       | 74             |
| 15      | 0                      | 0                      | 0                       | 0                      | alive        | 92              | alive       | 92             |
| 16      | 0                      | 1                      | 0                       | 1                      | dead         | 75              | dead        | 75             |
| 17      | 0                      | 0                      | 0                       | 0                      | dead         | 63              | dead        | 63             |
| 18      | 0                      | 0                      | 0                       | 0                      | dead         | 24              | dead        | 24             |
| 19      | 0                      | 1                      | 1                       | 0                      | dead         | 90              | alive       | 97             |
| 20      | 0                      | 1                      | 1                       | 0                      | alive        | 89              | alive       | 89             |
| 21      | 1                      | 1                      | 1                       | 0                      | dead         | 24              | dead        | 24             |
| 22      | 1                      | 1                      | 1                       | 1                      | alive        | 66              | alive       | 66             |
| 23      | 0                      | 0                      | 1                       | 1                      | alive        | 104             | alive       | 104            |
| 24      | 0                      | 1                      | 1                       | 1                      | alive        | 78              | alive       | 78             |
| 25      | 0                      | 0                      | 1                       | 0                      | alive        | 55              | alive       | 55             |
| 26      | 0                      | 1                      | 0                       | 0                      | dead         | 39              | dead        | 39             |
| 27      | 0                      | 0                      | 0                       | 0                      | dead         | 26              | dead        | 26             |

---

|    |   |   |   |   |       |     |       |     |
|----|---|---|---|---|-------|-----|-------|-----|
| 28 | 0 | 1 | 0 | 1 | dead  | 28  | dead  | 24  |
| 29 | 1 | 0 | 1 | 1 | dead  | 75  | dead  | 82  |
| 30 | 0 | 0 | 1 | 1 | dead  | 50  | dead  | 50  |
| 31 | 0 | 0 | 0 | 1 | dead  | 75  | dead  | 75  |
| 32 | 0 | 1 | 0 | 1 | alive | 102 | alive | 102 |
| 33 | 0 | 0 | 0 | 0 | dead  | 2   | dead  | 2   |
| 34 | 0 | 0 | 0 | 0 | alive | 87  | alive | 87  |
| 35 | 0 | 1 | 1 | 1 | dead  | 6   | dead  | 15  |
| 36 | 1 | 0 | 0 | 1 | alive | 105 | alive | 105 |
| 37 | 1 | 1 | 1 | 0 | dead  | 24  | dead  | 24  |
| 38 | 0 | 0 | 0 | 0 | dead  | 24  | dead  | 30  |
| 39 | 1 | 1 | 1 | 0 | dead  | 10  | dead  | 10  |
| 40 | 1 | 0 | 0 | 1 | dead  | 8   | dead  | 8   |
| 41 | 1 | 1 | 0 | 1 | dead  | 26  | dead  | 26  |
| 42 | 0 | 1 | 0 | 0 | dead  | 11  | dead  | 11  |
| 43 | 0 | 0 | 1 | 0 | dead  | 42  | dead  | 42  |
| 44 | 1 | 0 | 1 | 0 | dead  | 38  | dead  | 38  |
| 45 | 0 | 0 | 0 | 1 | dead  | 20  | alive | 28  |
| 46 | 1 | 1 | 0 | 1 | dead  | 87  | alive | 93  |
| 47 | 1 | 0 | 0 | 1 | dead  | 27  | dead  | 27  |
| 48 | 1 | 0 | 1 | 1 | alive | 90  | alive | 90  |
| 49 | 0 | 0 | 0 | 0 | alive | 105 | alive | 105 |
| 50 | 1 | 0 | 1 | 1 | alive | 101 | alive | 101 |
| 51 | 0 | 0 | 1 | 1 | dead  | 30  | dead  | 37  |
| 52 | 1 | 1 | 0 | 1 | alive | 95  | alive | 95  |
| 53 | 1 | 0 | 1 | 0 | alive | 103 | alive | 103 |
| 54 | 1 | 0 | 0 | 0 | dead  | 24  | dead  | 24  |
| 55 | 1 | 0 | 1 | 0 | alive | 88  | alive | 88  |
| 56 | 1 | 0 | 0 | 1 | dead  | 12  | dead  | 12  |
| 57 | 0 | 0 | 1 | 0 | dead  | 25  | dead  | 25  |

---

---

|    |   |   |   |   |       |     |       |     |
|----|---|---|---|---|-------|-----|-------|-----|
| 58 | 0 | 0 | 0 | 0 | dead  | 16  | dead  | 16  |
| 59 | 0 | 1 | 0 | 1 | alive | 88  | alive | 88  |
| 60 | 1 | 0 | 1 | 1 | alive | 82  | alive | 82  |
| 61 | 0 | 1 | 1 | 1 | dead  | 24  | dead  | 24  |
| 62 | 0 | 0 | 1 | 1 | alive | 103 | alive | 103 |
| 63 | 0 | 1 | 0 | 1 | alive | 51  | alive | 51  |
| 64 | 0 | 0 | 0 | 1 | dead  | 24  | dead  | 24  |
| 65 | 1 | 0 | 0 | 0 | dead  | 28  | dead  | 28  |
| 66 | 0 | 1 | 1 | 1 | dead  | 52  | dead  | 52  |
| 67 | 0 | 0 | 0 | 0 | dead  | 50  | dead  | 50  |
| 68 | 0 | 1 | 1 | 0 | alive | 0   | alive | 0   |
| 69 | 0 | 0 | 0 | 0 | dead  | 24  | dead  | 24  |
| 70 | 1 | 0 | 1 | 1 | alive | 94  | alive | 94  |
| 71 | 0 | 0 | 0 | 0 | alive | 66  | alive | 66  |
| 72 | 1 | 1 | 1 | 0 | dead  | 13  | dead  | 13  |
| 73 | 1 | 0 | 1 | 1 | dead  | 24  | dead  | 24  |
| 74 | 0 | 1 | 0 | 1 | dead  | 68  | alive | 73  |
| 75 | 0 | 0 | 1 | 1 | dead  | 76  | dead  | 76  |
| 76 | 0 | 1 | 0 | 0 | dead  | 15  | dead  | 15  |
| 77 | 0 | 1 | 0 | 0 | dead  | 14  | dead  | 14  |
| 78 | 0 | 0 | 1 | 1 | dead  | 40  | dead  | 40  |
| 79 | 0 | 1 | 0 | 0 | alive | 102 | alive | 102 |
| 80 | 0 | 0 | 0 | 0 | dead  | 60  | alive | 64  |
| 81 | 0 | 0 | 0 | 0 | alive | 106 | alive | 106 |
| 82 | 1 | 1 | 1 | 1 | dead  | 13  | dead  | 13  |
| 83 | 0 | 0 | 0 | 0 | alive | 36  | alive | 36  |
| 84 | 0 | 1 | 0 | 1 | dead  | 50  | dead  | 50  |
| 85 | 0 | 0 | 0 | 1 | dead  | 24  | dead  | 24  |
| 86 | 0 | 1 | 0 | 1 | alive | 80  | alive | 80  |
| 87 | 0 | 0 | 0 | 0 | dead  | 30  | dead  | 30  |

---

---

|     |   |   |   |   |       |     |       |     |
|-----|---|---|---|---|-------|-----|-------|-----|
| 88  | 0 | 1 | 0 | 0 | alive | 102 | alive | 102 |
| 89  | 0 | 0 | 1 | 0 | dead  | 16  | dead  | 24  |
| 90  | 1 | 1 | 1 | 0 | dead  | 1   | dead  | 1   |
| 91  | 1 | 1 | 0 | 0 | dead  | 40  | dead  | 40  |
| 92  | 0 | 0 | 0 | 0 | dead  | 19  | dead  | 25  |
| 93  | 1 | 1 | 1 | 0 | dead  | 25  | dead  | 25  |
| 94  | 0 | 0 | 0 | 1 | dead  | 15  | dead  | 20  |
| 95  | 0 | 0 | 0 | 1 | dead  | 12  | dead  | 18  |
| 96  | 0 | 1 | 1 | 1 | dead  | 25  | dead  | 25  |
| 97  | 0 | 1 | 1 | 0 | alive | 105 | alive | 105 |
| 98  | 0 | 0 | 0 | 0 | dead  | 36  | dead  | 36  |
| 99  | 0 | 0 | 0 | 0 | dead  | 92  | alive | 100 |
| 100 | 0 | 0 | 0 | 0 | alive | 67  | alive | 67  |
| 101 | 0 | 1 | 1 | 1 | dead  | 20  | dead  | 20  |
| 102 | 0 | 1 | 0 | 0 | dead  | 3   | dead  | 15  |
| 103 | 0 | 0 | 0 | 0 | dead  | 25  | dead  | 25  |
| 104 | 0 | 0 | 0 | 1 | dead  | 52  | dead  | 52  |
| 105 | 1 | 1 | 1 | 0 | alive | 36  | alive | 36  |
| 106 | 0 | 1 | 0 | 0 | dead  | 44  | dead  | 50  |
| 107 | 0 | 0 | 0 | 1 | alive | 63  | alive | 63  |
| 108 | 0 | 1 | 1 | 1 | dead  | 55  | alive | 60  |
| 109 | 1 | 1 | 1 | 1 | alive | 89  | alive | 89  |
| 110 | 0 | 0 | 0 | 1 | dead  | 20  | dead  | 20  |
| 111 | 0 | 1 | 0 | 1 | dead  | 76  | dead  | 76  |
| 112 | 1 | 0 | 1 | 0 | dead  | 58  | alive | 58  |
| 113 | 0 | 1 | 1 | 0 | dead  | 18  | dead  | 24  |
| 114 | 0 | 0 | 0 | 1 | dead  | 16  | dead  | 16  |
| 115 | 1 | 1 | 1 | 1 | dead  | 23  | dead  | 23  |
| 116 | 0 | 1 | 1 | 1 | alive | 105 | alive | 105 |
| 117 | 1 | 0 | 1 | 0 | dead  | 30  | dead  | 30  |

---

---

|     |   |   |   |   |       |    |       |    |
|-----|---|---|---|---|-------|----|-------|----|
| 118 | 0 | 1 | 0 | 0 | dead  | 16 | dead  | 16 |
| 119 | 0 | 0 | 0 | 0 | dead  | 15 | dead  | 15 |
| 120 | 0 | 0 | 1 | 0 | dead  | 26 | dead  | 26 |
| 121 | 0 | 0 | 1 | 0 | dead  | 48 | alive | 54 |
| 122 | 1 | 0 | 1 | 1 | dead  | 30 | dead  | 30 |
| 123 | 0 | 0 | 0 | 0 | dead  | 6  | dead  | 6  |
| 124 | 0 | 1 | 1 | 0 | dead  | 80 | dead  | 80 |
| 125 | 0 | 0 | 0 | 0 | dead  | 20 | dead  | 20 |
| 126 | 1 | 0 | 0 | 0 | dead  | 36 | dead  | 36 |
| 127 | 0 | 0 | 0 | 1 | alive | 98 | alive | 98 |
| 128 | 1 | 1 | 1 | 1 | alive | 76 | alive | 76 |
| 129 | 0 | 0 | 0 | 0 | dead  | 36 | dead  | 36 |
| 130 | 1 | 1 | 0 | 1 | dead  | 24 | dead  | 30 |
| 131 | 1 | 1 | 0 | 1 | dead  | 88 | alive | 96 |
| 132 | 0 | 1 | 0 | 0 | dead  | 30 | dead  | 30 |
| 133 | 0 | 0 | 0 | 0 | dead  | 62 | dead  | 62 |
| 134 | 1 | 0 | 0 | 1 | dead  | 98 | dead  | 98 |
| 135 | 0 | 1 | 1 | 1 | dead  | 55 | dead  | 61 |
| 136 | 1 | 0 | 1 | 0 | dead  | 24 | dead  | 24 |
| 137 | 0 | 1 | 1 | 0 | dead  | 36 | dead  | 36 |
| 138 | 1 | 0 | 0 | 0 | dead  | 13 | dead  | 13 |
| 139 | 1 | 0 | 0 | 0 | dead  | 37 | dead  | 37 |
| 140 | 0 | 0 | 1 | 0 | alive | 13 | alive | 13 |
| 141 | 0 | 0 | 0 | 0 | dead  | 37 | dead  | 37 |
| 142 | 1 | 1 | 1 | 0 | dead  | 14 | dead  | 14 |
| 143 | 0 | 0 | 1 | 0 | dead  | 75 | dead  | 75 |
| 144 | 1 | 1 | 1 | 1 | dead  | 20 | dead  | 26 |
| 145 | 0 | 0 | 0 | 0 | dead  | 30 | dead  | 30 |
| 146 | 0 | 0 | 1 | 1 | alive | 89 | alive | 89 |
| 147 | 1 | 0 | 0 | 0 | dead  | 26 | dead  | 26 |

---

---

|     |   |   |   |   |       |    |       |    |
|-----|---|---|---|---|-------|----|-------|----|
| 148 | 1 | 1 | 0 | 1 | alive | 63 | alive | 63 |
| 149 | 0 | 0 | 0 | 1 | dead  | 24 | dead  | 24 |
| 150 | 1 | 0 | 0 | 0 | dead  | 24 | dead  | 24 |
| 151 | 0 | 1 | 0 | 0 | dead  | 20 | dead  | 20 |
| 152 | 1 | 1 | 1 | 0 | dead  | 30 | dead  | 36 |
| 153 | 0 | 0 | 0 | 0 | alive | 55 | alive | 55 |
| 154 | 1 | 1 | 1 | 1 | dead  | 24 | dead  | 24 |
| 155 | 0 | 1 | 1 | 1 | alive | 55 | alive | 55 |
| 156 | 0 | 0 | 1 | 0 | dead  | 40 | dead  | 40 |
| 157 | 0 | 0 | 0 | 0 | dead  | 19 | dead  | 19 |

---

**Table S16. Multivariate COX regression analysis of the association of *ZFAS1* and *NOP58* expression with DFS and OS in CRC patients**

| Variables                      | DFS               |                 |                       |              | OS                |                 |                       |              |
|--------------------------------|-------------------|-----------------|-----------------------|--------------|-------------------|-----------------|-----------------------|--------------|
|                                | Total<br><i>n</i> | Events n<br>(%) | Adjusted<br>HR(95%CI) | <i>P</i>     | Total<br><i>n</i> | Events n<br>(%) | Adjusted<br>HR(95%CI) | <i>P</i>     |
| <b>All patients</b>            |                   |                 |                       |              |                   |                 |                       |              |
| <b><i>ZFAS1</i> expression</b> |                   |                 |                       |              |                   |                 |                       |              |
| Low                            | 100               | 63(63.0)        | 1(reference)          | -            | 100               | 56(56.0)        | 1(reference)          | -            |
| High                           | 57                | 46(80.7)        | 1.762(1.196-2.596)    | <b>0.004</b> | 57                | 43(75.4)        | 1.815(1.212-2.718)    | <b>0.004</b> |
| <b><i>NOP58</i> expression</b> |                   |                 |                       |              |                   |                 |                       |              |
| Low                            | 90                | 55(61.1)        | 1(reference)          | -            | 90                | 48(53.3)        | 1(reference)          | -            |
| High                           | 67                | 54(80.6)        | 1.691(1.156-2.473)    | <b>0.007</b> | 67                | 51(76.1)        | 1.727(1.160-2.573)    | <b>0.007</b> |

Abbreviations: 95%CI, 95% confidence interval; DFS, Disease-free survival; OS, Overall survival.

*P* values, Adjusted HR (95%CI) were assessed using multivariate Cox regression analysis adjusted for age, differentiation.
