# Supplementary material for: Long noncoding RNA ZFAS1 promoting small nucleolar RNA-mediated 2′-O-methylation via NOP58 recruitment in colorectal cancer
Source: PubMed Central journal article supplement (PMC7243338; doi:10.1186/s12943-020-01201-w), 2020-05-22
Supplement: 12943_2020_1201_MOESM3_ESM.pdf [file 12943_2020_1201_MOESM3_ESM.pdf]

### Additional file 3

## Long noncoding RNA ZFAS1 promoting small nucleolar RNA-mediated 2'-O-methylation via NOP58 recruitment in colorectal cancer

### This file includes:

- **Fig. S1** The expression and correlation analysis between ZFAS1 and snoRNP complex based on the TCGA database
- **Fig. S2** The (m)RNA expression of ZFAS1, NOP58, SNORD12C, and SNORD78 in CRC tissues and matched tumor-adjacent controls ( $n = 30$ )
- **Fig. S3** The correlation analysis of ZFAS1, NOP58, SNORD12C/78 expression in 30 paired CRC and control tissues
- **Fig. S4** The effect of ZFAS1 on cell proliferation and apoptosis in CRC cells
- **Fig. S5** The correlation of ZFAS1 and NOP58 expression and prognosis evaluation in CRC patient tissues
- **Fig. S6** The 2'-O-Me activity levels after interfering ZFAS1 and/or NOP58 expression
- **Fig. S7** The 2'-O-Me activities mediated by SNORD12C and SNORD78 after silencing SNORD12C and SNORD78

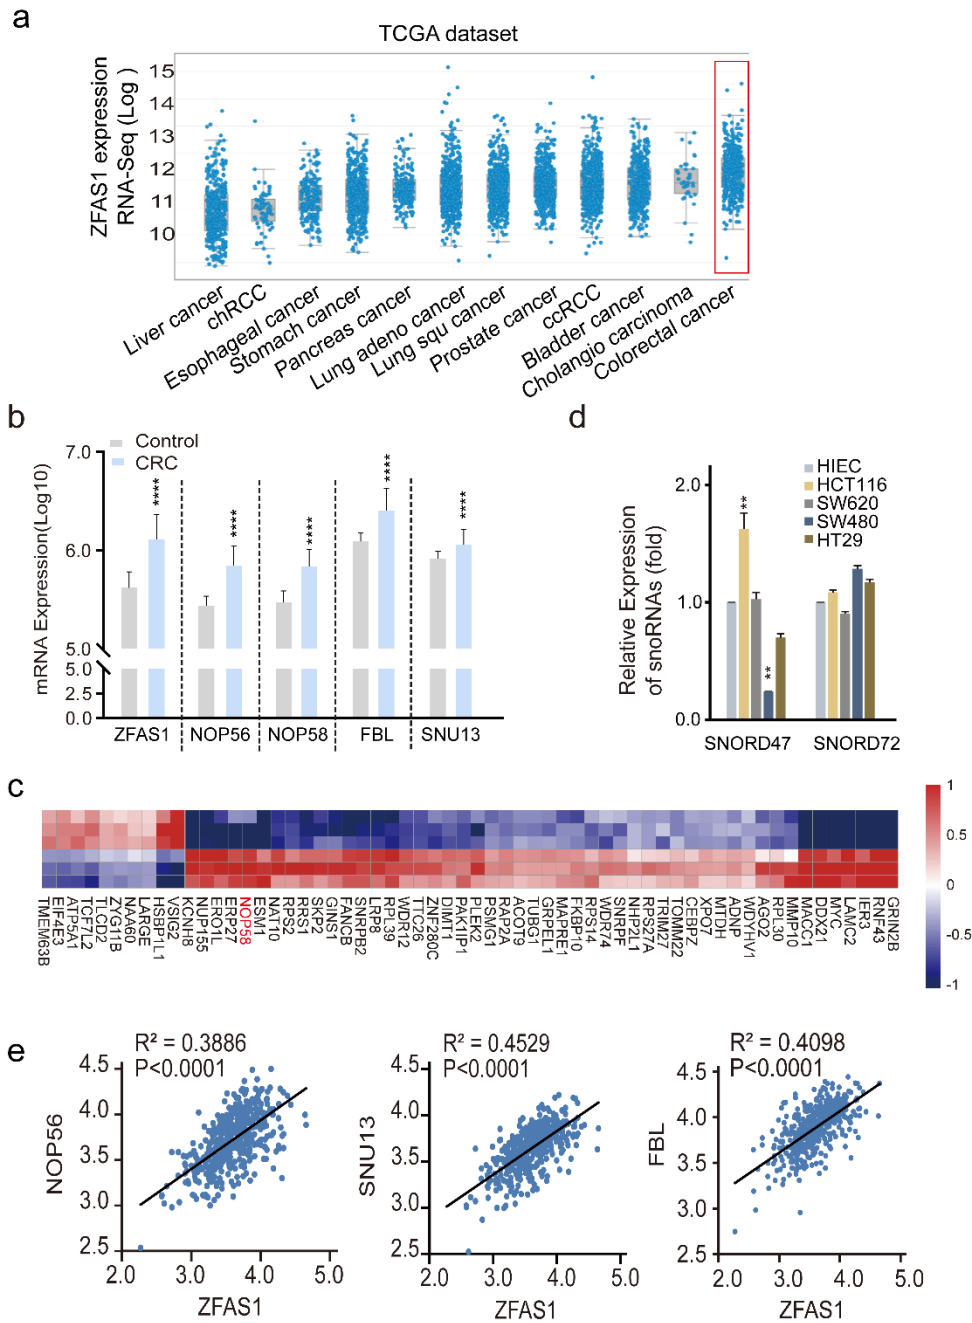

**Fig. S1 The expression and correlation analysis between ZFAS1 and snoRNP complex based on the TCGA database**

**a**, RNA-seq analysis illustrating the log<sub>2</sub> gene expression of ZFAS1 in a variety of tumor tissues based on the TCGA data (<http://www.cbioportal.org/>). **b**, The relative expression of ZFAS1 and its correlated snoRNPs including NOP56, NOP58, FBL, SNU13 in CRC patients tissues ( $n = 638$ ) and the normal controls ( $n = 51$ ) based on the TCGA data. **c**, The hierarchical cluster heat map of log<sub>2</sub> gene expression illustrating the most differential expressed mRNAs in CRC patient tissues vs. paired adjacent tumor control tissues ( $n=3$ ), selected up-regulated or down-regulated genes ( $P < 0.05$ ). Red in heat map denotes up-regulation. Blue denotes down-regulation. **d**, The expression levels of SNORD47 and SNORD72 in normal intestinal epithelial HIEC cell and CRC cells including HCT116, SW620, SW480, and HT29 detected by qRT-PCR assays. **e**, The linear correlation analysis representing the relationship of the snoRNP proteins such as SNU13, FBL and NOP56 expression levels with ZFAS1 upon TCGA CRC dataset.

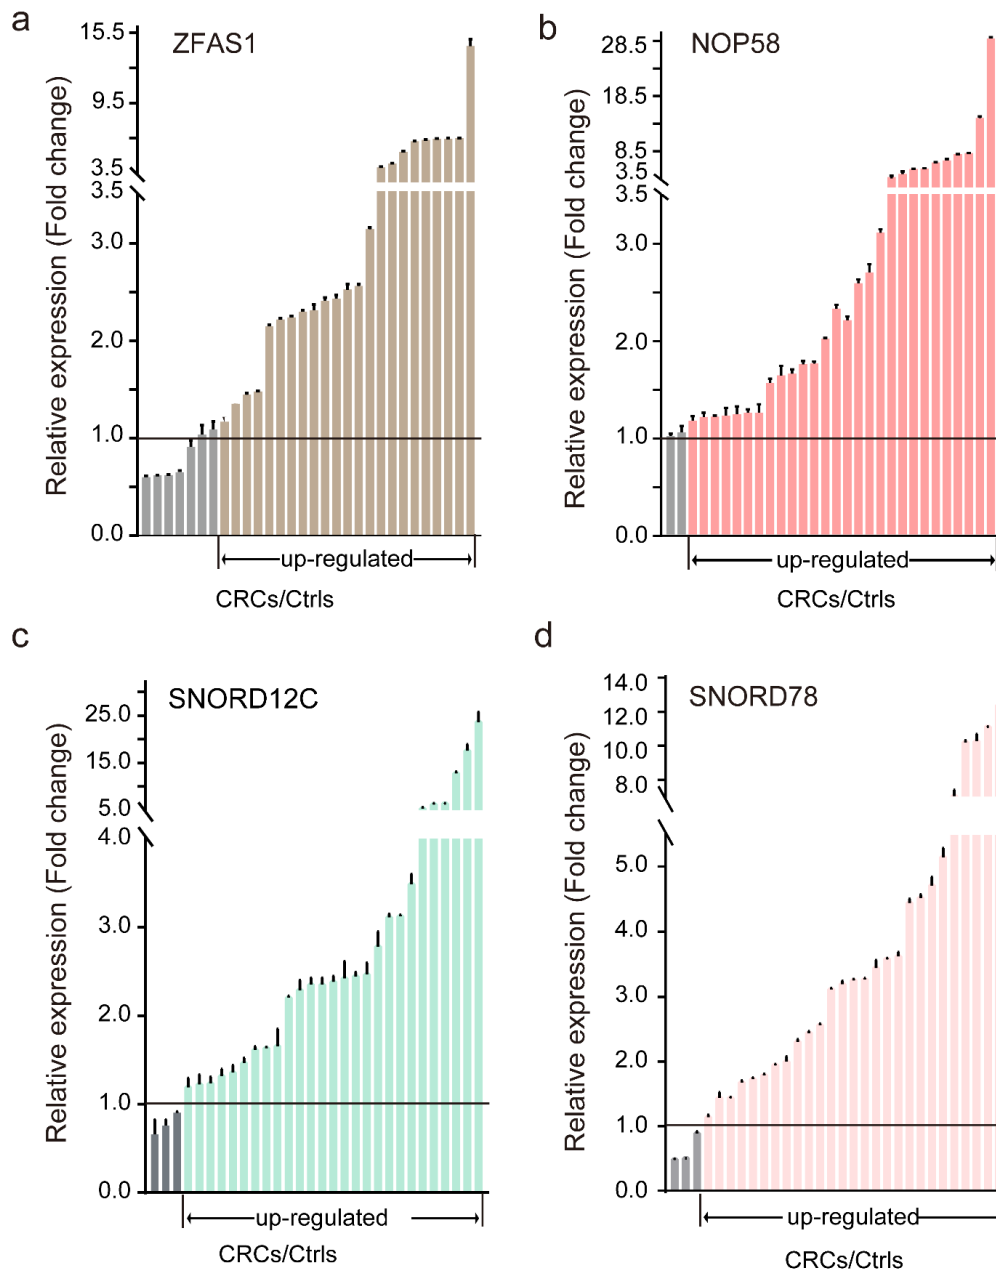

**Fig. S2 The (m)RNA expression of ZFAS1, NOP58, SNORD12C, and SNORD78 in CRC tissues and matched tumor-adjacent controls ( $n = 30$ )**

**a, b, c, and d,** The expression levels of screened ZFAS1(a), NOP58(b), SNORD12C(c), and SNORD78 (d) in 30 pairs of CRC tissues and adjacent-tumor control tissues detected by qRT-PCR assays.

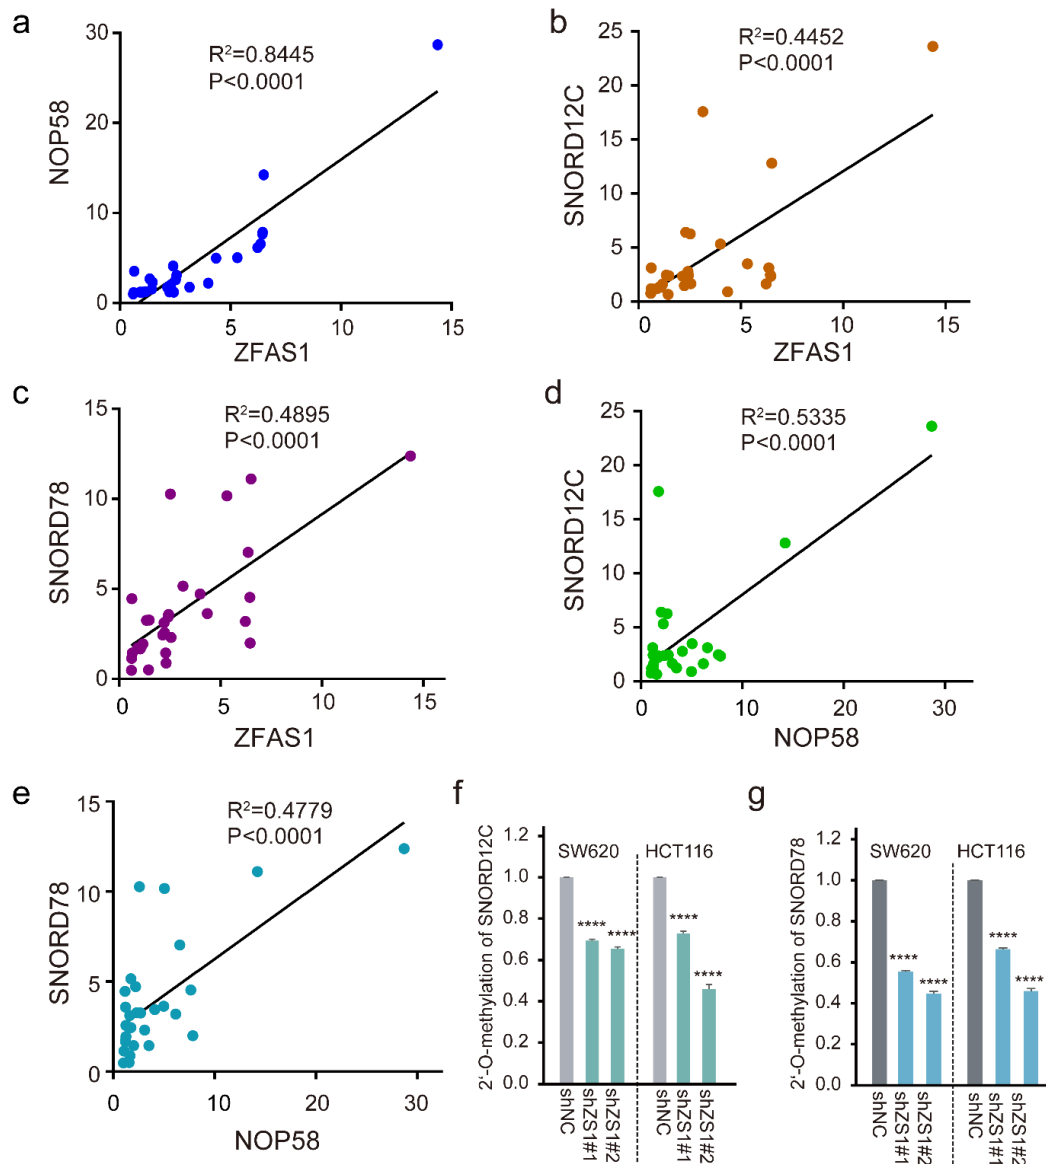

**Fig. S3 The correlation analysis of ZFAS1, NOP58, SNORD12C/78 expression in 30 paired CRC and control tissues**

The correlation analysis of ZFAS1 and NOP58(a), ZFAS1 and SNORD12C(b), ZFAS1 and SNORD78(c), NOP58 and SNORD12C(d), NOP58 and SNORD78(e) in 30 pairs of CRC tissues and adjacent-tumor control tissues. **f, g**, The histogram of 2'-O-methylation activities mediated by SNORD12C (f) and SNORD78 (g) after knockdown ZFAS1 in SW620 and HCT116 cells.

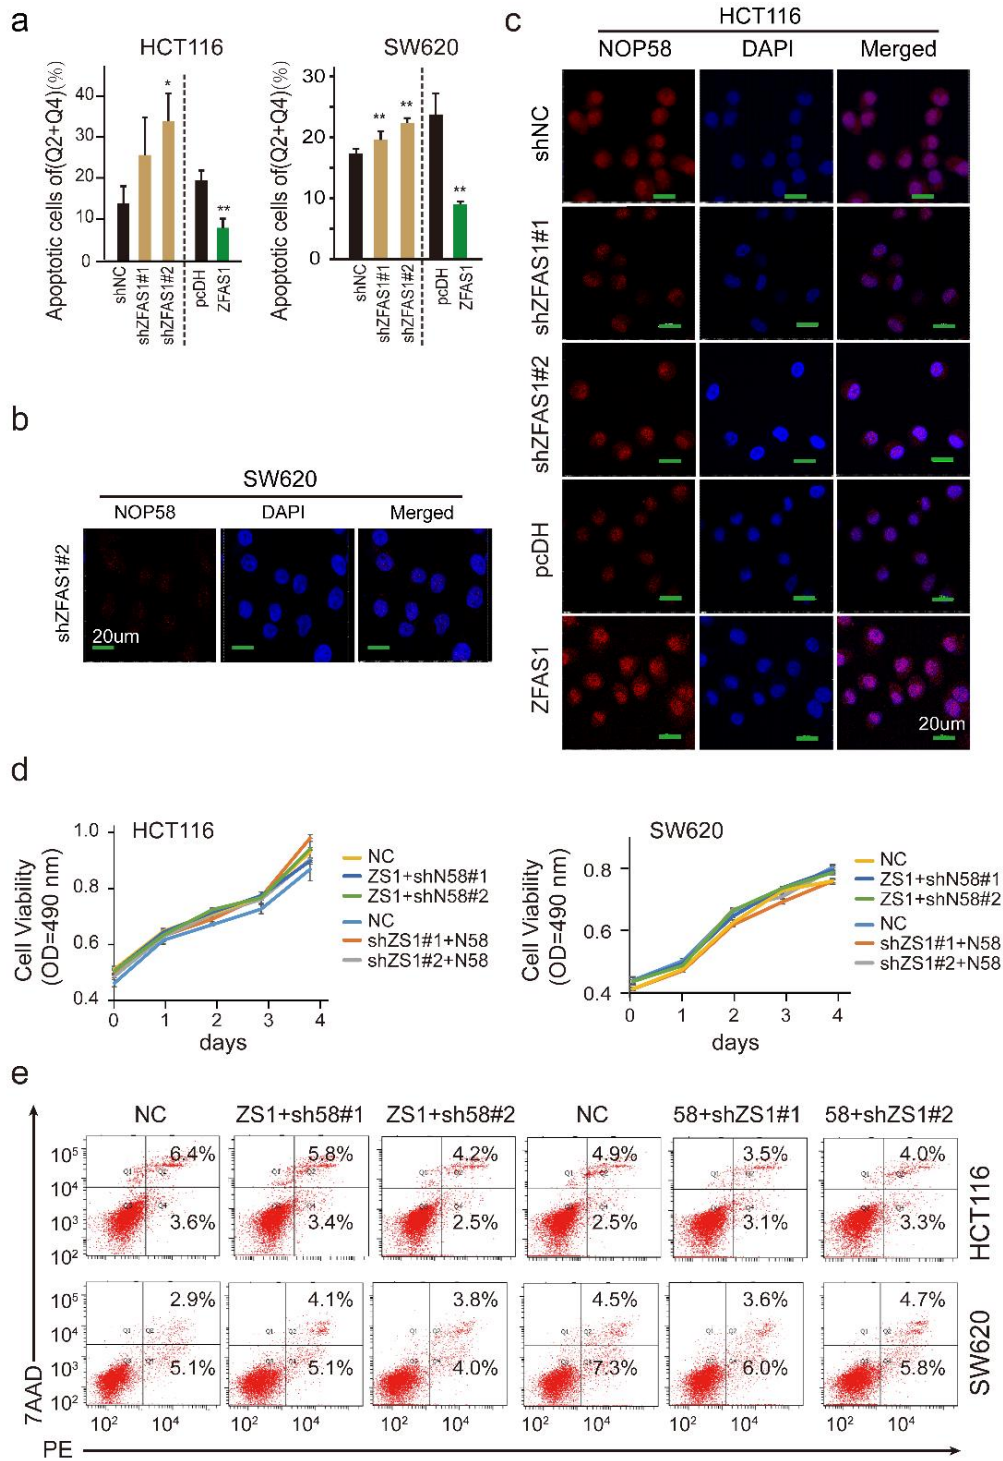

**Fig. S4 The effect of ZFAS1 on cell proliferation and apoptosis in CRC cells**

**a**, The histogram of the cell apoptosis percentage upon ZFAS1 overexpressing or silencing in HCT116 and SW620 cells detected by Flow cytometry. **b**, The NOP58 protein expression level was determined after ZFAS1 knockdown by IF assays in SW620 cells. **c**, The NOP58 protein expression level was determined after overexpressing or knockdown ZFAS1 by IF in HCT116 cells. Scale bar = 5 $\mu$ m. **d**, The cell proliferation abilities upon co-transfected with ZFAS1 and NOP58 in HCT116 and SW620 cells. n=3 independent experiments. **e**, The percentage (%) of cell apoptosis was detected based on co-transfected with ZFAS1 and NOP58 in HCT116 and SW620 cells by Flow cytometry. \*,  $P < 0.05$ ; \*\*,  $P < 0.01$ ; \*\*\*,  $P < 0.001$ ; \*\*\*\*,  $P < 0.0001$

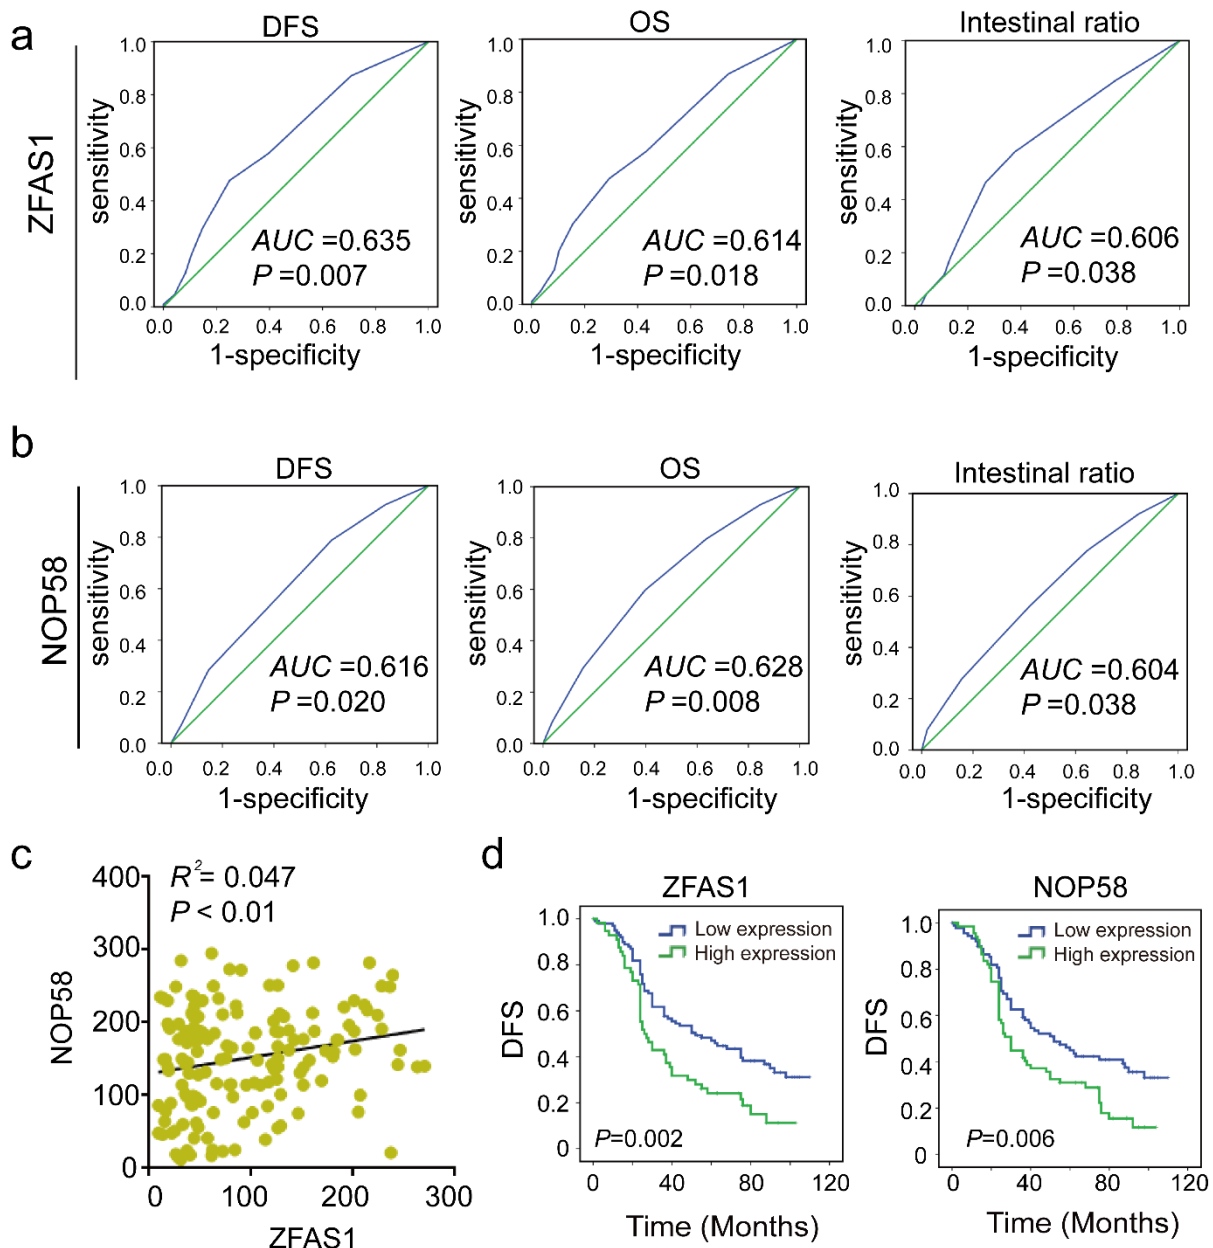

**Fig. S5 The correlation of ZFAS1 and NOP58 expression and prognosis evaluation in CRC patient tissues**

**a**, The ROC curves determining the cut-off values of ZFAS1 expression in paired CRC patient tissues vs. adjacent-tumor control tissues ( $n=157$ ). **b**, ROC curves evaluating the cutoff values of NOP58 expression in paired CRC patient tissues vs. adjacent-tumor control tissues ( $n=157$ ). **c**, The linear correlation analysis representing the relationship of the ZFAS1 expression and NOP58 expression. **d**, Kaplan-Meier curves representing the impact of ZFAS1 and NOP58 on disease-free survival in the CRC cohort ( $n=157$ ).

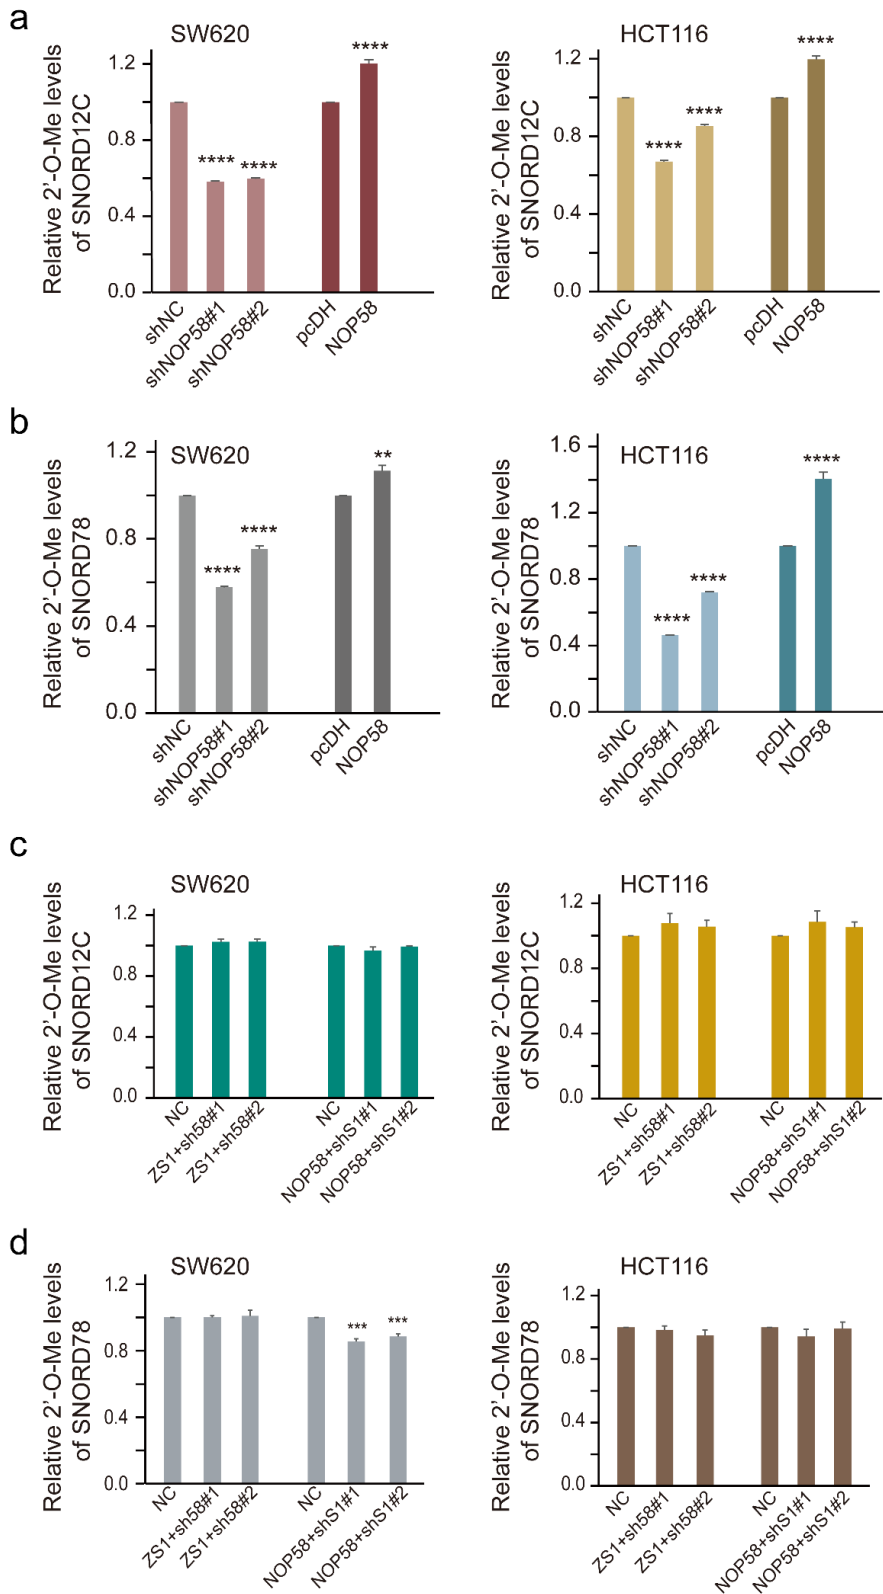

**Fig. S6 The 2'-O-Me activity levels after interfering ZFAS1 and/or NOP58 expression**  
**a, b**, The histogram showing the 2'-O-Me activities mediated by SNORD12C (a) or SNORD78 (b) after silencing or overexpression of NOP58 in SW620 and HCT116 cells by RTL-P assay.  
**c, d**, The bar chart illustrating the 2'-O-Me activities mediated by SNORD12C (c) or SNORD78 (d) after co-transfection with pcDH-ZFAS1 and shRNA-NOP58 vectors in both SW620 and HCT116 cells by RTL-P assay.

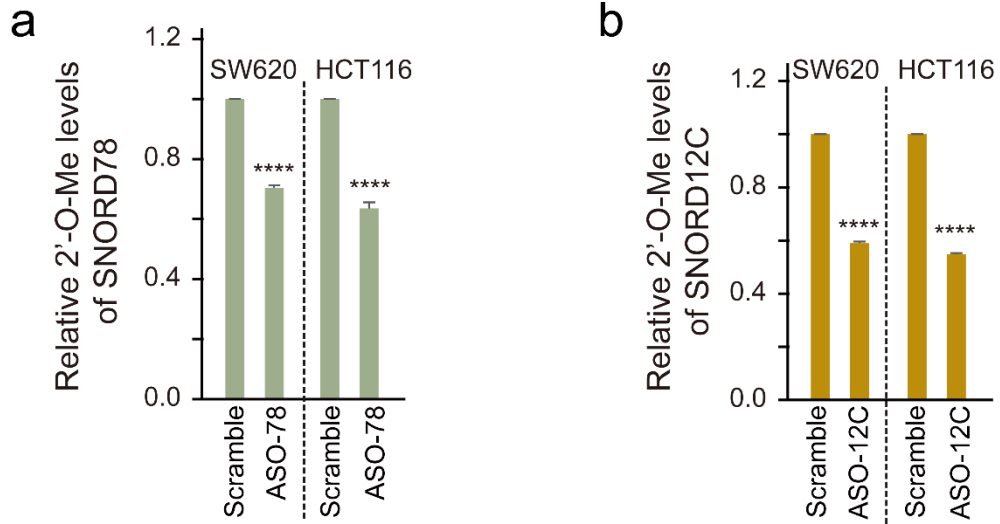

**Fig. S7 The 2'-O-Me activities mediated by SNORD12C and SNORD78 after silencing SNORD12C and SNORD78**

**a**, The histogram representing the 2'-O-Me activities after silencing SNORD78 (a) or SNORD12C (b) in SW620 and HCT116 cells assayed by RTL-P method.
